# Supplementary material
Source: Springer Nature journal article supplement (https://www.springermedizin.de/resource/supplementary/12913_2010_1605_MOESM4_ESM.pdf/9529368)
Supplement: MOESM4 [file 9529368]

Table 3: Distribution of female sex workers who experienced vaginal discharge in the past 12 months prior to the study (N=425).

| Age group    | Vaginal discharge or vaginal ulcer in the past 12 months |       |     |       |       | Chi-square, P value |
|--------------|----------------------------------------------------------|-------|-----|-------|-------|---------------------|
|              | Yes                                                      |       | No  |       | Total |                     |
|              | N                                                        | Row % | N   | Row % | N     |                     |
| 15-19        | 16                                                       | 37.2  | 27  | 62.8  | 43    |                     |
| 20-29        | 153                                                      | 56.9  | 116 | 43.1  | 269   | 13.42               |
| 30 and above | 78                                                       | 69.0  | 35  | 31.0  | 113   | P=.001              |
| Total        | 247                                                      | 58.1  | 178 | 41.9  | 425   |                     |
